# Supplementary material for: The Contribution of Pharmacists and Pharmacy Technicians to Person-Centred Care within a Medicine’s Optimisation in Care Homes Service: A Qualitative Evaluation
Source: MDPI journal article supplement (doi:10.3390/pharmacy9010034), 2021-02-10
Supplement: s1 [file s1]

**Figure S1: How the MOCH intervention has enabled person-centred care**

|                                                                                                                                                                                                                                            | Enablers                                                                                                                                                                                                                                                                                                                                                                                                                | Barriers                                                                                              |
|--------------------------------------------------------------------------------------------------------------------------------------------------------------------------------------------------------------------------------------------|-------------------------------------------------------------------------------------------------------------------------------------------------------------------------------------------------------------------------------------------------------------------------------------------------------------------------------------------------------------------------------------------------------------------------|-------------------------------------------------------------------------------------------------------|
| <b>Authentic Consciousness</b><br><br>A consideration of the person's life as a whole in order to help sustain meaning in life.                                                                                                            | MOCH HCP considering overall state of resident                                                                                                                                                                                                                                                                                                                                                                          | Previous rapid medication reviews poorly communicated                                                 |
|                                                                                                                                                                                                                                            | Understanding resident medication routines<br>MOCH HCP understanding effects of medication on resident's carers/family<br>Tailoring MOCH response for specific care home<br>Observing care home procedures before intervening<br>MOCH HCP understanding of resident's health values<br>Undertaking full review (medication and lifestyle) with all residents<br>Awareness of other agencies/clinical teams in care home |                                                                                                       |
| <b>Informed flexibility</b><br><br>The facilitation of decision making through information sharing and the integration of new information into established perspectives and care practices.                                                | Educating care home staff on lifestyle contributors to health                                                                                                                                                                                                                                                                                                                                                           | Residents not aware of purpose of medicines                                                           |
|                                                                                                                                                                                                                                            | Education to care home staff concerning medications (side effects, expiry dates)                                                                                                                                                                                                                                                                                                                                        | Care home variation of knowledge re understanding/dispensing of certain medications                   |
|                                                                                                                                                                                                                                            | Educating care home staff on medication processing IT systems                                                                                                                                                                                                                                                                                                                                                           |                                                                                                       |
|                                                                                                                                                                                                                                            | Improving lifestyle' education to residents                                                                                                                                                                                                                                                                                                                                                                             | Resident unaware of different medications administered to them                                        |
|                                                                                                                                                                                                                                            | Signposting to clinical/non clinical services if MOCH cannot support                                                                                                                                                                                                                                                                                                                                                    |                                                                                                       |
|                                                                                                                                                                                                                                            | Educating GPs on polypharmacy/deprescribing                                                                                                                                                                                                                                                                                                                                                                             |                                                                                                       |
|                                                                                                                                                                                                                                            | Educating GP surgery in care home staff competencies (e.g. taking BP)                                                                                                                                                                                                                                                                                                                                                   |                                                                                                       |
|                                                                                                                                                                                                                                            | Sharing intervention experiences with MOCH team                                                                                                                                                                                                                                                                                                                                                                         |                                                                                                       |
|                                                                                                                                                                                                                                            | Educate family on effects of medication and lifestyle choices on resident health                                                                                                                                                                                                                                                                                                                                        |                                                                                                       |
|                                                                                                                                                                                                                                            | Information of resident medication processes given to new care home when moved                                                                                                                                                                                                                                                                                                                                          |                                                                                                       |
| <b>Mutuality</b><br><br>The recognition of the others' values as being of equal importance in decision making.                                                                                                                             | Involving other healthcare teams in decision making                                                                                                                                                                                                                                                                                                                                                                     | Weak relationship between resident's family and care home staff                                       |
|                                                                                                                                                                                                                                            | Good working relationship with GP                                                                                                                                                                                                                                                                                                                                                                                       | Primary care unreceptive to MOCH team, refusing access to SystmONE                                    |
|                                                                                                                                                                                                                                            | Resident open to discuss meds with MOCH team                                                                                                                                                                                                                                                                                                                                                                            | Varied receptiveness of care home managers to MOCH initiative, restricting access to MOCH team.       |
|                                                                                                                                                                                                                                            | Liaising with other non-clinical staff in care home (e.g. chefs)                                                                                                                                                                                                                                                                                                                                                        |                                                                                                       |
|                                                                                                                                                                                                                                            | Awareness of care home view on MOCH project                                                                                                                                                                                                                                                                                                                                                                             |                                                                                                       |
|                                                                                                                                                                                                                                            | Positive working relationship with care home                                                                                                                                                                                                                                                                                                                                                                            |                                                                                                       |
|                                                                                                                                                                                                                                            | Non-judgemental approach to current care home processes                                                                                                                                                                                                                                                                                                                                                                 |                                                                                                       |
|                                                                                                                                                                                                                                            | Gaining family input on resident care where possible                                                                                                                                                                                                                                                                                                                                                                    |                                                                                                       |
|                                                                                                                                                                                                                                            | Education to CH staff of importance of resident home environment                                                                                                                                                                                                                                                                                                                                                        |                                                                                                       |
|                                                                                                                                                                                                                                            | MOCH HCP recognising care home staff needs and values                                                                                                                                                                                                                                                                                                                                                                   |                                                                                                       |
| <b>Transparency</b><br><br>Making explicit the intentions and motivations for action and the boundaries within which care decisions are set.                                                                                               | Implementing or updating online medication system                                                                                                                                                                                                                                                                                                                                                                       | Unclear resident medication notes                                                                     |
|                                                                                                                                                                                                                                            | Clear documentation re non-pharmacological interventions                                                                                                                                                                                                                                                                                                                                                                | Medication processing not up to date/unsynced between staff                                           |
|                                                                                                                                                                                                                                            | Clearly communicating MOCH aims to all parties involved                                                                                                                                                                                                                                                                                                                                                                 | MOCH teams operating locally, no person to escalate barriers or decision making                       |
|                                                                                                                                                                                                                                            | Using all assessments to formulate centralised plan of care                                                                                                                                                                                                                                                                                                                                                             | Little care home communication with resident                                                          |
|                                                                                                                                                                                                                                            | Follow up with resident/family important to establish                                                                                                                                                                                                                                                                                                                                                                   | Large numbers of healthcare workers involved in resident decision making                              |
|                                                                                                                                                                                                                                            | Constant line of communication with family/carers on drug side effects/changes                                                                                                                                                                                                                                                                                                                                          | MOCH team member absence                                                                              |
|                                                                                                                                                                                                                                            | Establishing introduction with care home and primary care early on                                                                                                                                                                                                                                                                                                                                                      | MOCH team confusion on which CCG to liaise with                                                       |
|                                                                                                                                                                                                                                            | Unified communication between all parties involved in resident care                                                                                                                                                                                                                                                                                                                                                     | Time taken for new service to establishing communication between clinical teams/primary care networks |
|                                                                                                                                                                                                                                            | Frequent visits to see and speak to residents                                                                                                                                                                                                                                                                                                                                                                           | Previous medication administration system not been successful                                         |
|                                                                                                                                                                                                                                            | MOCH team working towards same goals internally                                                                                                                                                                                                                                                                                                                                                                         |                                                                                                       |
|                                                                                                                                                                                                                                            | Open door policy for care home staff and residents to discuss MOCH                                                                                                                                                                                                                                                                                                                                                      |                                                                                                       |
|                                                                                                                                                                                                                                            | Communication on what care home is doing well                                                                                                                                                                                                                                                                                                                                                                           |                                                                                                       |
| <b>Negotiation</b><br><br>A culture of care that values the views of the patient as a legitimate basis for decision making while recognizing that being the final arbiter of decisions is of secondary importance.                         | Agreement from all parties involved in resident care is important                                                                                                                                                                                                                                                                                                                                                       | Patient unresponsive to MOCH team member (not compos mentis) - unable to participate                  |
|                                                                                                                                                                                                                                            | Resident-led communication and changes                                                                                                                                                                                                                                                                                                                                                                                  |                                                                                                       |
|                                                                                                                                                                                                                                            | Addressing family concerns                                                                                                                                                                                                                                                                                                                                                                                              |                                                                                                       |
|                                                                                                                                                                                                                                            | Addressing resident medication concerns/issues with health                                                                                                                                                                                                                                                                                                                                                              |                                                                                                       |
|                                                                                                                                                                                                                                            | Family and care home involvement if resident is not compos mentis                                                                                                                                                                                                                                                                                                                                                       |                                                                                                       |
| <b>Sympathetic Presence</b><br><br>An engagement that recognizes the uniqueness and value of the individual by appropriately responding to cues that maximize coping resources through the recognition of important agendas in daily life. | Reviewing residents in sensitive manner                                                                                                                                                                                                                                                                                                                                                                                 | Resident previously overlooked by HCP                                                                 |
|                                                                                                                                                                                                                                            | Tailoring discussion to resident's needs                                                                                                                                                                                                                                                                                                                                                                                |                                                                                                       |
|                                                                                                                                                                                                                                            | Giving residents autonomy over own health choices                                                                                                                                                                                                                                                                                                                                                                       |                                                                                                       |
|                                                                                                                                                                                                                                            | MOCH team taking time to help resident with everyday needs                                                                                                                                                                                                                                                                                                                                                              |                                                                                                       |
|                                                                                                                                                                                                                                            | MOCH team member advocating for resident's wellbeing                                                                                                                                                                                                                                                                                                                                                                    |                                                                                                       |
|                                                                                                                                                                                                                                            | Taking time to get to know residents                                                                                                                                                                                                                                                                                                                                                                                    |                                                                                                       |
|                                                                                                                                                                                                                                            | Working to tailor intervention to resident                                                                                                                                                                                                                                                                                                                                                                              |                                                                                                       |
| <b>Patient/resident's values history</b>                                                                                                                                                                                                   | Residents feeling they were not 'forgotten'                                                                                                                                                                                                                                                                                                                                                                             | Apprehension around medication changes                                                                |
|                                                                                                                                                                                                                                            |                                                                                                                                                                                                                                                                                                                                                                                                                         | Lack of resident's confidence to ask for changes                                                      |
| <b>Context of care environment</b>                                                                                                                                                                                                         | Supportive and present family                                                                                                                                                                                                                                                                                                                                                                                           | MOCH HCP unclear about the imperative to reduce cost through deprescribing                            |
|                                                                                                                                                                                                                                            | Care home staff's education on medications                                                                                                                                                                                                                                                                                                                                                                              | Care home culture around resident autonomy                                                            |
|                                                                                                                                                                                                                                            | Good working relationship with GP practice                                                                                                                                                                                                                                                                                                                                                                              | High turnover in care home staff                                                                      |
|                                                                                                                                                                                                                                            | Type of care home (residential, nursing)                                                                                                                                                                                                                                                                                                                                                                                | Covering MOCH over large geographical areas                                                           |
|                                                                                                                                                                                                                                            | MOCH team working within a primary care setting (e.g. GP surgery)                                                                                                                                                                                                                                                                                                                                                       | Multiple care groups to liaise with                                                                   |
|                                                                                                                                                                                                                                            | Care home having good prior working procedures                                                                                                                                                                                                                                                                                                                                                                          | Care homes being a 'forgotten entity'                                                                 |
|                                                                                                                                                                                                                                            | Time to implement initiative                                                                                                                                                                                                                                                                                                                                                                                            | Continuing change in the organisation of MOCH.                                                        |
|                                                                                                                                                                                                                                            | CCG targeting suitable care homes                                                                                                                                                                                                                                                                                                                                                                                       |                                                                                                       |
| <b>Practitioner or carer values history, knowledge and experience</b>                                                                                                                                                                      | Experience of assessing residents/patients medication and state                                                                                                                                                                                                                                                                                                                                                         | Different clinical system challenge for nurses (pre-intervention)                                     |
|                                                                                                                                                                                                                                            | Experience of assessing lifestyle factors in addition to medication                                                                                                                                                                                                                                                                                                                                                     | Challenging behaviour of resident                                                                     |
|                                                                                                                                                                                                                                            | Previous experience of working in care homes or community setting                                                                                                                                                                                                                                                                                                                                                       |                                                                                                       |
|                                                                                                                                                                                                                                            | Experienced consultation skills                                                                                                                                                                                                                                                                                                                                                                                         |                                                                                                       |
|                                                                                                                                                                                                                                            | Observation of care home processes                                                                                                                                                                                                                                                                                                                                                                                      |                                                                                                       |
|                                                                                                                                                                                                                                            | Care of patient always at forefront of practice                                                                                                                                                                                                                                                                                                                                                                         |                                                                                                       |
|                                                                                                                                                                                                                                            | Enjoyment of patient/resident-facing role                                                                                                                                                                                                                                                                                                                                                                               |                                                                                                       |
| <b>Resident outcomes</b>                                                                                                                                                                                                                   | Improved physical state                                                                                                                                                                                                                                                                                                                                                                                                 |                                                                                                       |
|                                                                                                                                                                                                                                            | Improved mental state/mood                                                                                                                                                                                                                                                                                                                                                                                              |                                                                                                       |
|                                                                                                                                                                                                                                            | Higher frequency of resident socialising                                                                                                                                                                                                                                                                                                                                                                                |                                                                                                       |
|                                                                                                                                                                                                                                            | More engagement in future medication recommendations                                                                                                                                                                                                                                                                                                                                                                    |                                                                                                       |
|                                                                                                                                                                                                                                            | Better pain management                                                                                                                                                                                                                                                                                                                                                                                                  |                                                                                                       |
|                                                                                                                                                                                                                                            | Lower resident fall risk                                                                                                                                                                                                                                                                                                                                                                                                |                                                                                                       |
|                                                                                                                                                                                                                                            | Higher resident independence                                                                                                                                                                                                                                                                                                                                                                                            |                                                                                                       |

|                           |                                                                           |
|---------------------------|---------------------------------------------------------------------------|
|                           | Better diet and hydration                                                 |
|                           | Improved confidence in taking medications                                 |
|                           | Reduced embarrassment from medication side effects                        |
|                           |                                                                           |
| Carers/Family outcomes    | Care staff can spend more time with residents in more need                |
|                           | Care staff confidence in ordering medications                             |
|                           | Carers aware of lifestyle changes affecting residents                     |
|                           | Care home staff understanding of patient involvement in medication review |
|                           | Improved staff awareness around medication wastage                        |
|                           | Better established relationships between carer and resident               |
|                           | Family awareness of medications                                           |
|                           | Reduced family distress                                                   |
| Organisational outcomes   | Reduction in care home medication mistakes                                |
|                           | Less resources and staff needed to care for resident                      |
|                           | Improved information flow from care home to GP surgery                    |
|                           | Reduction in medication errors                                            |
|                           | Improved education on medications                                         |
|                           | Improved medication storage                                               |
|                           | Less GP or primary care visits to care home                               |
|                           | Improvement in care home safety                                           |
| MOCH team member outcomes | Reducing hospital admissions                                              |
|                           | Growth in experience in community settings/care home settings             |
|                           | Adapting to different work environments                                   |
|                           | Further training opportunities (e.g. prescribing)                         |
|                           | Improved clinical experience                                              |
|                           | Improved confidence in medicine reviews                                   |
|                           | Improved team communication skills and cohesion                           |
|                           | Appreciation of primary care roles                                        |
|                           | Confidence to grow in career                                              |
